# Supplementary material for: Database limitations for studying the human gut microbiome
Source: PeerJ Comput Sci. 2020 Aug 17;6:e289. doi: 10.7717/peerj-cs.289 (PMC7924478; doi:10.7717/peerj-cs.289)
Supplement: Supplemental Information 2 — We selected four new studies to see how many new genera would be included if we kept sampling studies through out the years. [file peerj-cs-06-289-s002.xlsx]

## Sheet: Table SX
Genus	Dias 2020	David 2014	Zhernakova 2016	Chauhan 2018	Johnson 2020	Sum	KEGG	eggNOG
Abiotrophia	X					1
Acetoanaerobium	X					1
Actinomyces	X					1
Akkermansia	X	X	X		X	4
Alistipes	X	X	X		X	4
Anaerococcus	X					1
Anaerofustis	X					1
Anaerostipes	X			X		2
Anaerotruncus	X		X			2
Arcanobacterium	X					1
Atlantibacter	X					1
Bacteroides	X	X	X	X	X	5	29963	64827
Bifidobacterium	X	X	X		X	4
Bilophila	X		X			2
Blautia	X	X		X	X	4
Butyrivibrio	X		X			2
Campylobacter	X					1
Candidatus	X					1
Carnobacterium	X					1
Citrobacter	X					1
Clostridium	X	X	X	X	X	5	106686	143509
Collinsella	X		X	X	X	4
Coprococcus	X	X	X	X		4
Corynebacterium	X				X	2
Cronobacter	X					1
Desulfarculus	X					1
Desulfomicrobium	X					1
Desulfovibrio	X	X	X		X	4
Dichelobacter	X					1
Dorea	X			X	X	3
Enterobacter	X					1
Enterococcus	X					1
Escherichia	X	X				2
Eubacterium	X	X	X			3
Faecalibacterium	X	X		X	X	4
Fibrobacter	X					1
Finegoldia	X					1
Fusobacterium	X	X				2
Hathewaya	X					1
Helicobacter	X					1
Holdemania	X					1
Klebsiella	X					1
Lactobacillus	X		X	X	X	4
Lactococcus	X				X	2
Lelliottia	X					1
Methanobrevibacter	X		X			2
Methanosphaera	X					1
Mitsuokella	X		X			2
Moorella	X					1
Morganella	X					1
Paeniclostridium	X					1
Parabacteroides	X	X	X	X	X	5	2965	6595
Parascardovia	X					1
Parvimonas	X					1
Peptoclostridium	X					1
Peptostreptococcus	X					1
Pluralibacter	X					1
Prevotella	X	X	X	X	X	5	8990	44085
Proteus	X					1
Providencia	X					1
Rathayibacter	X					1
Rhodococcus	X					1
Roseburia	X	X	X	X	X	5	4439	0
Rothia	X					1
Ruminococcus	X	X	X	X		4
Scardovia	X					1
Shigella	X					1
Shimwellia	X					1
Slackia	X			X		2
Streptococcus	X		X	X	X	4
Subdoligranulum	X		X			2
Sutterella	X	X		X	X	4
Tannerella	X					1
Thermoanaerobacterium	X					1
Tsukamurella	X					1
Weissella	X					1
Asteroleplasma		X				1	0	0
Barnesiella			X			1	1063	0
Catenibacterium			X	X		2	0	0
Coprobacillus			X			1	0	0
Dialister		X	X	X	X	4	779	2604
Eggerthella			X			1	2422	4823
Erwinia		X				1	23954	19854
Flavonifractor					X	1	1620	0
Gordonibacter			X			1	815	0
Lachnobacterium		X				1	0	0
Lachnospira		X	X	X		3	0	0
Odoribacter		X	X	X		3	1340	2971
Olsenella			X			1	2084	1606
Oscillibacter					X	1	2769	3491
Oscillospira		X		X	X	3	0	0
Paraprevotella			X			1	0	2854
Phascolarctobacterium		X	X			2	1265	1797
Raoultella		X				1	10699	7
Turicibacter				X	X	2	1142	2309
