# Supplementary material for: Database limitations for studying the human gut microbiome
Source: PeerJ Comput Sci. 2020 Aug 17;6:e289. doi: 10.7717/peerj-cs.289 (PMC7924478; doi:10.7717/peerj-cs.289)
Supplement: Supplemental Information 3 — The most shared identifiers from the KEGG and EggNOG database, we used those identifiers which were present in the maximum number of species and genera. [file peerj-cs-06-289-s003.xlsx]

## Sheet: core_genus_KEGG
Entry	Name(s)	Definition	Function	Number of genera sharing this KO
K02601	nusG	Transcription termination/antitermination protein NusG	Transcription machinery	64
K02867	RP-L11, MRPL11, rplK	Large subunit ribosomal protein L11	Ribosomal proteins	64
K02876	RP-L15, MRPL15, rplO	Large subunit ribosomal protein L15	Ribosomal proteins	64
K02890	RP-L22, MRPL22, rplV	Large subunit ribosomal protein L22	Ribosomal proteins	64
K02946	RP-S10, MRPS10, rpsJ	Small subunit ribosomal protein S10	Ribosomal proteins	64
K02948	RP-S11, MRPS11, rpsK	Small subunit ribosomal protein S11	Ribosomal proteins	64
K02982	RP-S3, rpsC	Small subunit ribosomal protein S3	Ribosomal proteins	64
K02994	RP-S8, rpsH	Small subunit ribosomal protein S8	Ribosomal proteins	64
K03106	SRP54, ffh	Signal recognition particle subunit SRP54 [EC:3.6.5.4]	Quorum sensing - Protein export - Bacterial secretion system	64
K00088	IMPDH, guaB	IMP dehydrogenase [EC:1.1.1.205]	Purine metabolism - Drug metabolism	63
K00939	adk, AK	Adenylate kinase [EC:2.7.4.3]	Purine metabolism - Thaimine metabolism	63
K00948	PRPS, prsA	Ribose-phosphate pyrophosphokinase [EC:2.7.6.1]	PPP - Purine metabolism	63
K01000	mraY	Phospho-N-acetylmuramoyl-pentapeptide-transferase [EC:2.7.8.13]	Peptidoglycan biosynthesis - Vancomycin resistance	63
K01889	FARSA, pheS	Phenylalanyl-tRNA synthetase alpha chain [EC:6.1.1.20]	Aminoacyl-tRNA biosynthesis	63
K02863	RP-L1, MRPL1, rplA	Large subunit ribosomal protein L1	Ribosomal proteins	63
K02864	RP-L10, MRPL10, rplJ	Large subunit ribosomal protein L10	Ribosomal proteins	63
K02874	RP-L14, MRPL14, rplN	Large subunit ribosomal protein L14	Ribosomal proteins	63
K02881	RP-L18, MRPL18, rplR	Large subunit ribosomal protein L18	Ribosomal proteins	63
K02886	RP-L2, MRPL2, rplB	Large subunit ribosomal protein L2	Ribosomal proteins	63
K02892	RP-L23, MRPL23, rplW	Large subunit ribosomal protein L23	Ribosomal proteins	63
K02931	RP-L5, MRPL5, rplE	Large subunit ribosomal protein L5	Ribosomal proteins	63
K02933	RP-L6, MRPL6, rplF	Large subunit ribosomal protein L6	Ribosomal proteins	63
K02952	RP-S13, rpsM	Small subunit ribosomal protein S13	Ribosomal proteins	63
K02954	RP-S14, MRPS14, rpsN	Small subunit ribosomal protein S14	Ribosomal proteins	63
K02956	RP-S15, MRPS15, rpsO	Small subunit ribosomal protein S15	Ribosomal proteins	63
K02965	RP-S19, rpsS	Small subunit ribosomal protein S19	Ribosomal proteins	63
K02986	RP-S4, rpsD	Small subunit ribosomal protein S4	Ribosomal proteins	63
K02988	RP-S5, MRPS5, rpsE	Small subunit ribosomal protein S5	Ribosomal proteins	63
K02996	RP-S9, MRPS9, rpsI	Small subunit ribosomal protein S9	Ribosomal proteins	63
K03657	uvrD, pcrA	DNA helicase II / ATP-dependent DNA helicase PcrA [EC:3.6.4.12]	Mismatch repair	63
K09903	pyrH	Uridylate kinase [EC:2.7.4.22]	Pyrimidine metabolism	63

## Sheet: core_species_KEGG
Entry	Name(s)	Definition	Function	Number of species sharing this KO
K00927	PGK, pgk	Phosphoglycerate kinase [EC:2.7.2.3]	Glycolysis / Gluconeogenesis	48
K01000	mraY	Phospho-N-acetylmuramoyl-pentapeptide-transferase [EC:2.7.8.13]	Peptidoglycan biosynthesis - Vancomycin resistance	48
K01803	TPI, tpiA	Triosephosphate isomerase (TIM) [EC:5.3.1.1]	Glycolysis / Gluconeogenesis - Fructose and mannose metabolism	48
K01866	YARS, tyrS	Tyrosyl-tRNA synthetase [EC:6.1.1.1]	Aminoacyl-tRNA biosynthesis	48
K02601	nusG	Transcription termination/antitermination protein NusG	Transcription machinery	48
K02874	RP-L14, MRPL14, rplN	Large subunit ribosomal protein L14	Ribosomal proteins	48
K02876	RP-L15, MRPL15, rplO	Large subunit ribosomal protein L15	Ribosomal proteins	48
K02881	RP-L18, MRPL18, rplR	Large subunit ribosomal protein L18	Ribosomal proteins	48
K02890	RP-L22, MRPL22, rplV	Large subunit ribosomal protein L22	Ribosomal proteins	48
K02892	RP-L23, MRPL23, rplW	Large subunit ribosomal protein L23	Ribosomal proteins	48
K02895	RP-L24, MRPL24, rplX	Large subunit ribosomal protein L24	Ribosomal proteins	48
K02904	RP-L29, rpmC	Large subunit ribosomal protein L29	Ribosomal proteins	48
K02906	RP-L3, MRPL3, rplC	Large subunit ribosomal protein L3	Ribosomal proteins	48
K02946	RP-S10, MRPS10, rpsJ	Small subunit ribosomal protein S10	Ribosomal proteins	48
K02948	RP-S11, MRPS11, rpsK	Small subunit ribosomal protein S11	Ribosomal proteins	48
K02954	RP-S14, MRPS14, rpsN	Small subunit ribosomal protein S14	Ribosomal proteins	48
K02965	RP-S19, rpsS	Small subunit ribosomal protein S19	Ribosomal proteins	48
K02982	RP-S3, rpsC	Small subunit ribosomal protein S3	Ribosomal proteins	48
K02986	RP-S4, rpsD	Small subunit ribosomal protein S4	Ribosomal proteins	48
K02992	RP-S7, MRPS7, rpsG	Small subunit ribosomal protein S7	Ribosomal proteins	48
K02994	RP-S8, rpsH	Small subunit ribosomal protein S8	Ribosomal proteins	48
K00088	IMPDH, guaB	IMP dehydrogenase [EC:1.1.1.205]	Purine metabolism - Drug metabolism	47
K00384	trxB, TRR	Thioredoxin reductase (NADPH) [EC:1.8.1.9]	Selenocompound metabolism	47
K00939	adk, AK	Adenylate kinase [EC:2.7.4.3]	Purine metabolism - Thiamine metabolism	47
K01591	pyrF	Orotidine-5'-phosphate decarboxylase [EC:4.1.1.23]	Pyrimidine metabolism	47
K01784	galE, GALE	UDP-glucose 4-epimerase [EC:5.1.3.2]	Galactose metabolism	47
K01868	TARS, thrS	Threonyl-tRNA synthetase [EC:6.1.1.3]	Aminoacyl-tRNA biosynthesis	47
K01915	glnA, GLUL	Glutamine synthetase [EC:6.3.1.2]	Aminoacids metabolism	47
K01923	purC	Phosphoribosylaminoimidazole-succinocarboxamide synthase [EC:6.3.2.6]	Purine metabolism	47
K01939	purA, ADSS	Adenylosuccinate synthase [EC:6.3.4.4]	Purine metabolism - Aminoacids metabolism	47
K01951	guaA, GMPS	GMP synthase (glutamine-hydrolysing) [EC:6.3.5.2]	Purine metabolism - Drug metabolism	47
K01992	ABC-2.P	ABC-2 type transport system permease protein	Transporters	47
K02600	nusA	Transcription termination/antitermination protein NusA	Transcription machinery	47
K02863	RP-L1, MRPL1, rplA	Large subunit ribosomal protein L1	Ribosomal proteins	47
K02867	RP-L11, MRPL11, rplK	Large subunit ribosomal protein L11	Ribosomal proteins	47
K02886	RP-L2, MRPL2, rplB	Large subunit ribosomal protein L2	Ribosomal proteins	47
K02933	RP-L6, MRPL6, rplF	Large subunit ribosomal protein L6	Ribosomal proteins	47
K02952	RP-S13, rpsM	Small subunit ribosomal protein S13	Ribosomal proteins	47
K02961	RP-S17, MRPS17, rpsQ	Small subunit ribosomal protein S17	Ribosomal proteins	47
K02988	RP-S5, MRPS5, rpsE	Small subunit ribosomal protein S5	Ribosomal proteins	47
K03076	secY	Preprotein translocase subunit SecY	Quorum sensing - Bacterial secretion system	47
K03110	ftsY	Fused signal recognition particle receptor	Quorum sensing - Bacterial secretion system	47
K03531	ftsZ	Cell division protein FtsZ	Cell cycle	47
K03687	GRPE	Molecular chaperone GrpE	Folding catalysts	47

## Sheet: core_genus_EGG
Entry	Definition	Function	OGs species	OGs proteins	Number of genera sharing this EGG
COG0085	DNA-dependent RNA polymerase	Transcription	2013	2889	64
COG0459	Prevents misfolding and promotes the refolding	Post-translational modification, protein turnover, and chaperones	2002	5192	64
COG0020	Generates different type of terpenoids	Lipid transport and metabolism	1963	2614	63
COG0049	One of the primary rRNA binding proteins	Translation, ribosomal structure and biogenesis	2002	2420	63
COG0051	tRNA binding	Translation, ribosomal structure and biogenesis	2000	2346	63
COG0057	Glyceraldehyde3phosphate dehydrogenase	Carbohydrate transport and metabolism	2007	3934	63
COG0060	tRNA(Ile)-dependent editing activities	Translation, ribosomal structure and biogenesis	2013	2427	63
COG0080	This protein binds directly to 23S ribosomal RNA	Translation, ribosomal structure and biogenesis	2012	2550	63
COG0081	Binds directly to 23S rRNA	Translation, ribosomal structure and biogenesis	2007	2435	63
COG0088	One of the primary rRNA binding proteins	Translation, ribosomal structure and biogenesis	2018	2406	63
COG0090	One of the primary rRNA binding proteins	Translation, ribosomal structure and biogenesis	2023	2464	63
COG0092	Binds the lower part of the 30S subunit head	Translation, ribosomal structure and biogenesis	2021	2212	63
COG0094	Binds and probably mediates the attachment of the 5S RNA into the large ribosomal subunit	Translation, ribosomal structure and biogenesis	2012	2293	63
COG0097	This protein binds to the 23S rRNA	Translation, ribosomal structure and biogenesis	2020	2379	63
COG0098	Located at the back of the 30S subunit body	Translation, ribosomal structure and biogenesis	2018	2542	63
COG0102	This protein is one of the early assembly proteins of the 50S ribosomal subunit	Translation, ribosomal structure and biogenesis	2015	2450	63
COG0103	30S ribosomal protein S9	Translation, ribosomal structure and biogenesis	2010	2403	63
COG0142	Synthase	Coenzyme transport and metabolism	1982	4797	63
COG0152	SAICAR synthetase	Nucleotide transport and metabolism	1850	1993	63
COG0180	TryptophanyltRNA synthetase	Translation, ribosomal structure and biogenesis	2022	2501	63
COG0185	Protein S19 forms a complex with S13 that binds strongly to the 16S ribosomal RNA	Translation, ribosomal structure and biogenesis	1996	2292	63
COG0197	Binds 23S rRNA and is also seen to make contacts with the A and possibly P site tRNAs	Translation, ribosomal structure and biogenesis	2025	2444	63
COG0200	Binds to the 23S rRNA	Translation, ribosomal structure and biogenesis	2016	2438	63
COG0201	The central subunit of the protein translocation channel SecYEG	Intracellular trafficking, secretion, and vesicular transport	2013	2370	63
COG0206	Essential cell division protein that forms a contractile ring structure (Z ring) at the future cell division site	Cell cycle control, cell division, chromosome partitioning	1732	2124	63
COG0244	50s ribosomal protein L10	Translation, ribosomal structure and biogenesis	2005	2485	63
COG0256	Binds and probably mediates the attachment of the 5S RNA into the large ribosomal subunit	Ribosomal proteins	2010	2214	63
COG0361	Seems to stimulate more or less all the activities of the other two initiation factors, IF-2 and IF-3	Translation, ribosomal structure and biogenesis	2000	2294	63
COG0463	Glycosyl transferase, family 2	Cell wall/membrane/envelope biogenesis	1932	12141	63
COG0480	Catalyzes the GTP-dependent ribosomal translocation step during translation elongation	Translation, ribosomal structure and biogenesis	2024	4645	63
COG0484	ATP binding to DnaK triggers the release of the substrate protein	Post-translational modification, protein turnover, and chaperones	1952	7941	63
COG0495	Leucyl-trna synthetase	Translation, ribosomal structure and biogenesis	2016	2401	63
COG0516	Catalyzes the conversion of inosine 5'-phosphate (IMP) to xanthosine 5'-phosphate (XMP)	Nucleotide transport and metabolism	1864	2757	63
COG0522	One of the primary rRNA binding proteins	Translation, ribosomal structure and biogenesis	2024	2634	63
COG0528	UMP kinase activity	Nucleotide transport and metabolism	1797	1883	63
COG0532	One of the essential components for the initiation of protein synthesis	Translation, ribosomal structure and biogenesis	2014	2484	63
COG0550	Releases the supercoiling and torsional tension of DNA	Replication, recombination and repair	2003	3498	63
COG0576	Participates actively in the response to hyperosmotic and heat shock by preventing the aggregation of stress-denatured proteins	Post-translational modification, protein turnover, and chaperones	1935	2179	63
COG0778	Nitroreductase	Energy production and conversion	1734	5352	63

## Sheet: core_species_EGG
Entry	Definition	Function	OGs species	OGs proteins	Number of species sharing this EGG
COG0459	Prevents misfolding and promotes the refolding and proper assembly of unfolded polypeptides generated under stress conditions	Post-translational modification, protein turnover, and chaperones	2002	5192	82
COG0085	DNA-dependent RNA polymerase	Transcription	2013	2889	81
COG0016	PhenylalanyL-tRNA synthetase, alpha subunit	Translation, ribosomal structure and biogenesis	2020	2350	80
COG0468	Can catalyze the hydrolysis of ATP in the presence of single-stranded DNA	Replication, recombination and repair	1997	3023	80
COG0484	ATP binding to DnaK triggers the release of the substrate protein	Post-translational modification, protein turnover, and chaperones	1952	7941	80
ENOG4105CJ9	Prevents misfolding and promotes the refolding and proper assembly of unfolded polypeptides generated under stress conditions	Post-translational modification, protein turnover, and chaperones	1637	1988	80
COG0008	Catalyzes the attachment of glutamate to tRNA(Glu)	Translation, ribosomal structure and biogenesis	2024	4412	79
COG0048	Interacts with and stabilizes bases of the 16S rRNA that are involved in tRNA selection in the A site and with the mRNA backbone	Translation, ribosomal structure and biogenesis	2013	2427	79
COG0049	One of the primary rRNA binding proteins	Translation, ribosomal structure and biogenesis	2002	2420	79
COG0052	30S ribosomal protein S2	Translation, ribosomal structure and biogenesis	2022	2559	79
COG0073	Is required not only for elongation of protein synthesis but also for the initiation of all mRNA translation through initiator tRNA(fMet) aminoacylation	Translation, ribosomal structure and biogenesis	2007	3982	79
COG0080	This protein binds directly to 23S ribosomal RNA	Translation, ribosomal structure and biogenesis	2012	2550	79
COG0081	Binds directly to 23S rRNA	Translation, ribosomal structure and biogenesis	2007	2435	79
COG0086	DNA-dependent RNA polymerase	Transcription	2013	3112	79
COG0087	One of the primary rRNA binding proteins	Translation, ribosomal structure and biogenesis	2016	2511	79
COG0088	One of the primary rRNA binding proteins	Translation, ribosomal structure and biogenesis	2018	2406	79
COG0090	One of the primary rRNA binding proteins	Translation, ribosomal structure and biogenesis	2023	2464	79
COG0093	Binds to 23S rRNA	Translation, ribosomal structure and biogenesis	2016	2347	79
COG0096	One of the primary rRNA binding proteins	Translation, ribosomal structure and biogenesis	2022	2373	79
COG0097	This protein binds to the 23S rRNA	Translation, ribosomal structure and biogenesis	2020	2379	79
COG0124	Histidyl-trna synthetase	Translation, ribosomal structure and biogenesis	2016	2515	79
COG0126	Phosphoglycerate kinase	Carbohydrate transport and metabolism	2006	2267	79
COG0149	Triosephosphate isomerase	Carbohydrate transport and metabolism	2001	2368	79
COG0172	Catalyzes the attachment of serine to tRNA(Ser)	Translation, ribosomal structure and biogenesis	2020	2470	79
COG0185	Protein S19 forms a complex with S13 that binds strongly to the 16S ribosomal RNA	Translation, ribosomal structure and biogenesis	1996	2292	79
COG0197	Binds 23S rRNA and is also seen to make contacts with the A and possibly P site tRNAs	Translation, ribosomal structure and biogenesis	2025	2444	79
COG0198	One of the proteins that surrounds the polypeptide exit tunnel on the outside of the subunit	Translation, ribosomal structure and biogenesis	1995	2381	79
COG0202	DNA-dependent RNA polymerase	Transcription	2016	2417	79
COG0215	Cysteinyl-tRNA synthetase	Translation, ribosomal structure and biogenesis	1994	2427	79
COG0256	This is one of the proteins that binds and probably mediates the attachment of the 5S RNA into the large ribosomal subunit	Translation, ribosomal structure and biogenesis	2010	2214	79
COG0258	Structure-specific nuclease with 5'-flap endonuclease and 5'-3' exonuclease activities involved in DNA replication and repair	Replication, recombination and repair	2009	3320	79
COG0322	The UvrABC repair system catalyzes the recognition and processing of DNA lesions	Replication, recombination and repair	1677	2055	79
COG0441	Threonine-tRNA ligase activity	Translation, ribosomal structure and biogenesis	2016	2803	79
COG0443	Heat shock protein	Post-translational modification, protein turnover, and chaperones	1957	7226	79
COG0462	Phosphoribosyl pyrophosphate synthase	Nucleotide transport and metabolism	2002	3053	79
COG0463	Glycosyl transferase, family 2	Cell wall/membrane/envelope biogenesis	1932	12141	79
COG0480	Catalyzes the GTP-dependent ribosomal translocation step during translation elongation	Translation, ribosomal structure and biogenesis	2024	4645	79
COG0492	Thioredoxin reductase	Post-translational modification, protein turnover, and chaperones	1890	4039	79
COG0495	Leucyl-trna synthetase	Translation, ribosomal structure and biogenesis	2016	2401	79
COG0518	Catalyzes the synthesis of GMP from XMP	Nucleotide transport and metabolism	1933	3209	79
COG0519	Catalyzes the synthesis of GMP from XMP	Nucleotide transport and metabolism	1932	2050	79
COG0522	One of the primary rRNA binding proteins	Translation, ribosomal structure and biogenesis	2024	2634	79
COG0532	One of the essential components for the initiation of protein synthesis	Translation, ribosomal structure and biogenesis	2014	2484	79
COG0533	Required for the formation of a threonylcarbamoyl group on adenosine at position 37 (t(6)A37) in tRNAs that read codons beginning with adenine	Post-translational modification, protein turnover, and chaperones	2019	2374	79
COG0541	Involved in targeting and insertion of nascent membrane proteins into the cytoplasmic membrane	Intracellular trafficking, secretion, and vesicular transport	2002	2167	79
COG0556	DNA wrap is dependent on ATP binding by UvrB and probably causes local melting of the DNA helix	Replication, recombination and repair	1690	1750	79
COG0771	Cell wall formation	Cell wall/membrane/envelope biogenesis	1630	1675	79
COG1109	Catalyzes the conversion of glucosamine-6-phosphate to glucosamine-1-phosphate	Carbohydrate transport and metabolism	1997	4829	79
